# Supplementary material for: Mutations in Splicing Factor Genes Are a Major Cause of Autosomal Dominant Retinitis Pigmentosa in Belgian Families
Source: PLoS One. 2017 Jan 11;12(1):e0170038. doi: 10.1371/journal.pone.0170038 (PMC5226823; doi:10.1371/journal.pone.0170038)
Supplement: S1 Table — Three to four pairs of primers were designed for microsatellites flanking an adRP gene within a distance of one to two megabases (Mbs) up- or downstream (Primer3plus; http://www.bioinformatics.nl/cgi-bin/primer3plus/primer3plus.cgi). Six primer pairs were designed for the RP63 locus on chromosome 6q23, with adjacent primers less than one Mb apart. Each forward primer is tagged with a M13-tail. Sequence of the M13-tail: 5’-cacgacgttgtaaaacgac-3’. (XLSX) [file pone.0170038.s001.xlsx]

## Sheet: Blad1
Gene	Marker name	Genomic coordinates (GRCh38/hg38)	Forward primer (5’ -> 3’)	Reverse primer (5’ ->3’)
RPE65	D1S198	Chr1:67011193-67011440	tggatgtgacgataacagtcttt	aattttggacctgccatgc
RPE65	D1S2806	Chr1:67868127-67868336	atctgctggctgatggaaac	cccaaagtcctgggattaca
RPE65		Chr1:68894507-68915642
RPE65	D1S2803	Chr1:68918290-68918519	tggtaaatgtgttggggaaa	gcctccctattaggctctcaa
RPE65	D1S219	Chr1:69841056-69841275	atacccaagtgccctccac	tgtgtgttcataatccttcttgttt
PRPF3	D1S2344	Chr1:145531927-145532186	tccatgccatctccatgtta	ccatcagtgacaaccaccag
PRPF3		Chr1:150293928-150325704
PRPF3	D1S498	Chr1:151301531-151301780	acaacagtagaacaaatggggta	tcagaatgctcgcttgtcttt
PRPF3	D1S2347	Chr1:151321894-151322117	gaggcaaaggcaagaggatt	agcctcgaactcatgggtaa
SEMA4A	D1S2715	Chr1:153584289-153584522	ccctctccaggaacagctc	agaggctggcttcttgctc
SEMA4A	D1S1595	Chr1:155688383-155688635	caggagaatggtatgaacctgg	aagacacttcagtggcttgattc
SEMA4A		Chr1:156123322-156147542
SEMA4A	D1S2624	Chr1:156631258-156631483	ctcctggctttgttgggtt	aggcagaggcagacacagat
SNRNP200	D2S2159	Chr2:96049799-96050004	acacgtccaaaggagtgcat	actcagcccctccctgaa
SNRNP200		Chr2:96940074-96971307
SNRNP200	D2S113	Chr2:97277614-97277771	ttttttttccacagatatatacccata	aactcttggctgggcttg
SNRNP200	D2S2222	Chr2:8299450-98299699	gaaatgaggcatccaaatcag	tctcatatcttgtttggattattagtg
RHO	D3S3607	Chr3:127272927-127273170	tccttgcatctgagtcttggt	ccctttatgcaaaaacacatga
RHO	D3S3606	Chr3:127200139-127200388	gcctggactaacaccattgc	ggggctcgaaagacagtaaa
RHO		Chr3:129247482-129254187
RHO	D3S1587	Chr3:130798788-130799000	aaagaggcagagacacagaagg	gcccttcctccacctctcta
RHO	D3S3514	Chr3:131580118-131580347	aggactgagtctgattctgctg	agctgagatcgtgccattg
GUCA1B, PRPH2	D6S1575	Chr6:41147532-41147768	catcctcctctggcacctt	aagtaatttcctgaattcacacagc
GUCA1B, PRPH2	D6S1017	Chr6:41677224-41677356	taaatggatgggtggatgc	tccaccttttcatctgtcca
GUCA1B		Chr6:42151022-42162694
PRPH2		Chr6:42664333-42690358
GUCA1B, PRPH2	D6S1582	Chr6:43098686-43098920	cccagggatgagagagacac	cctgacactgcaaaggtgtt
GUCA1B, PRPH2	D6S271	Chr6:43500906-43501082	ggaaatggcttaaaatctattcct	tggtgggtgttacagccatt
KLHL7	D7S2458	Chr7:22091100-22091344	gcctcaaaccaaaacctcaa	ccagtcgagaccccaaact
KLHL7	D7S629	Chr7:22814040-22814316	ctccaaagaattcatccatctg	tcagagccttgttagtttaacagc
KLHL7		Chr7:23145353-23165669
KLHL7	D7S2463	Chr7:23644906-23645150	atgtagggcttgtggattgc	gttgcatgatgatgtgaacg
KLHL7	D7S673	Chr7:23848441-23848644	ggcagtttttcgtttggtgt	tctctgatggggtccttgag
RP9	D7S2252	Chr7:32073582-32073789	gcttactgggttatagccaaca	gctctttccagtaaggggttg
RP9	D7S690	Chr7:32360131-32360379	gggggaaaaaggtagagttaaa	ttccctgagaggctcaatgt
RP9		Chr7:33134410-33149002
RP9	D7S484	Chr7:35284817-35285066	gcaatgtcaaaacaactgaaaaa	gaactcatgcgattagtgtaagc
RP9	D7S2250	Chr7:35378393-35378623	cagctgaggtagccacaatg	ttgtgctaaaggaacgcaga
IMPDH1	D7S504	Chr7:127615349-127615597	cactcaggagaagcattacttgtg	cacaagcagaaagaaacttagctg
IMPDH1	D7S1875	Chr7:127750605-127750850	gccattagctctcaagttggtt	cagcaatcctggcttcattt
IMPDH1		Chr7:128032331-128046024
IMPDH1	D7S530	Chr7:129202375-129202621	tgggattttccctcattgtc	cacagactatatacccagccaaa
IMPDH1	D7S2519	Chr7:129963650-129963879	aatcactcatctggcctgga	cgtgctgaggtgaaatgaaa
RP1	D8S1110	Chr8:53180919-53181180	gagctccttcccaacattca	aagctgctgtaagttctttctaagc
RP1	D8S1737	Chr8:54786847-54787073	aaatatggcaaacggaagga	ggcttgccctacagatttca
RP1		Chr8:55528627-55543394
RP1	D8S509	Chr8:55593932-55594171	catgatgtgaggtcccaatg	accaccatggcacacgttta
RP1	D8S2332	Chr8:56130217-56130452	ttgtggatacaggctcgttg	tcttcttactttttcccccatt
TOPORS	D9S1853	Chr9:29859717-29859994	ccagcctcactgaaatgtga	tggccagttttagaaagtttgg
TOPORS	D9S43	Chr9:30880544-30880768	tatgttcatcaaggatattgtcctg	agatggagtcacagtcaaattctatc
TOPORS		Chr9:32540542-32552626
TOPORS	D9S1788	Chr9:33135789-33136038	caaaacccctgaggttgaga	cttccatcgagtcccttcct
TOPORS	D9S1845	Chr9:33156933-33157181	gggtgttgaaagagccaca	gcctcacactgacacttcca
PRPF4	D9S262	Chr9:116022778-116023024	atcgattgcagtgggaagtt	tggagaaggaaaagacatctca
PRPF4		Chr9:116037914-116055185
PRPF4	D9S289	Chr9:116415495-116415709	gagctcgatggaggggatac	ctcctgacctcctgatctgc
PRPF4	D9S51	Chr9:117857006-117857251	ggttgagtgggtcagggtta	tgggtaccaattccaactagaaa
HK1	D10S1647	Chr10:70944314-70944548	tcctacccggcacaaagt	cagtccaacacacacaacactc
HK1	D10S1672	Chr10:71023850-71024056	gagccgacatcattgcact	gcactgtatgatgctggcttt
HK1		Chr10:71075610-71161637
HK1	D10S1742	Chr10:71184078-71184320	cctggctgaccagctaaagt	gcttccctctgtggattcaa
HK1	D10S1665	Chr10:71303517-71303743	cttcacaaagaggctcctgaa	ccaatctccctgcctgtatg
BEST1, ROM1	D11S1765	Chr11:60778553-60778777	ttgcacaatctgtccactcc	cagaaatgccacccagagag
BEST1, ROM1	D11S4076	Chr11:61363138-61363387	cccctggaaaatagacttgc	gttccctgcaggactgtgag
BEST1		Chr11:61717356-61731935
ROM1		Chr11:62380213-62382592
BEST1, ROM1	D11S4205	Chr11:63182931-63183170	tgttcttgccacagagtgaaa	gcttagttgctattacatgatgacc
BEST1, ROM1	D11S1883	Chr11:63373765-63374016	aataccttagtaggccggcg	cctgctccgctctgctt
NRL	D14S990	Chr14:23586359-23586602	tgtggacagcatgtctgtgtt	accatggataaatggcaacc
NRL	D14S972	Chr14:24347740-24347960	cataacagccaagaagtttttgaa	tgtaatatttcttttagctctgactgc
NRL		Chr14:24549316-24553832
NRL	D14S64	Chr14:24560267-24560503	catgggatagaagcaacaca	ccggtagtcccagctactca
NRL	D14S264	Chr14:25279963-25280207	tcttgaatttggcggactgt	atgccatttggtgagtaccg
RDH12	D14S981	Chr14:65814576-65814772	ttacagggatgagccaccat	ccagcccaggtaggtagc
RDH12		Chr14:68168603-68201168
RDH12	D14S1069	Chr14:68388204-68388431	tgagactttcctttggcatgt	tcatcaatgttataccaaaacaaca
RDH12	D14S1065	Chr14:68905781-68906011	gcatttcccagtctcccttt	ggagctgcccaactagagtg
NR2E3	D15S131	Chr15:71183812-71184059	tccaatcctggagatttgct	ggggtgtgctttagaggtga
NR2E3	D15S1050	Chr15:71980953-71981186	cattcttctattaggttccctgttt	actggcagggggtgattatt
NR2E3		Chr15:72102888-72110597
NR2E3	D15S204	Chr15:72300663-72300962	aaggaaaggccttgaatctg	ggagggcacatactcttctga
NR2E3	D15S980	Chr15:73113337-73113636	tctccctcagaggaattctatcat	cacatatgccttcctggagtc
PRPF8	D17S849	Chr17:432545-432794	ctcctccaattctgttctaagatt	aggaggctgcccaataaaaa
PRPF8	D17S1529	Chr17:1049291-1049528	accattcctccagagtggtg	tggtaggagggtgcttatgg
PRPF8		Chr17:1553923-1588176
PRPF8	D17S831	Chr17:1910534-1910766	cccagatcccaaagaaaaca	gaaggccagagcaagaggtc
PRPF8	D17S829	Chr17:3545273-3545522	agactgaggctggagcatgt	tctcctaggggagcgtgtta
CA4	D17S1290	Chr17:56331397-56331643	cacgaggttgaggcttcagt	acgatgggggaacagttaaa
CA4	D17S1604	Chr17:57977453-57977702	gagcccaggagtttgaggat	tctttaagcaatcatgtcaaaactt
CA4		Chr17:58227302-58236906
CA4	D17S792	Chr17:58239811-58240044	agggaggagaacccccttat	gccagtgaccctcagagaag
CA4	D17S923	Chr17:58368789-58369038	tcaaggctaataataaagcacaaga	agtgtgtcgatgattgcatgt
FSCN2	D17S1822	Chr17:77781003-77781219	ggccagttctttcccatttt	agccccagaaactttccttc
FSCN2	D17S784	Chr17:77802234-77802475	tgggtttgtgggtgatgtta	tggagctcctgaaaggaaaa
FSCN2		Chr17:79495417-79504156
FSCN2	D17S928	Chr17:80252886-80253129	ccactggctgcttccatatt	atcactggaacccaggaggt
CRX	D19S412	Chr19:47010898-47011136	tgcggcagaagaatcactta	ccagagccattactcgtcct
CRX	D19S596	Chr19:47973497-47973742	gaggaggaacagggctctta	cacactgtctgccttccttg
CRX		Chr19:48325099-48346586
CRX	D19S867	Chr19:50538601-50538838	ggacaggtagggtaaatgcttg	gcagccagttcctgtcctta
PRPF31	D19S572	Chr19:54105412-54105614	ggacaactggaaaagggtca	tatttgggtgtgctgacacg
PRPF31	D19S927	Chr19:54298266-54298488	actgcagccttgaactcctg	gagtgcagtgatgcaatcaaa
PRPF31		Chr19:54618790-54635150
PRPF31	D19S926	Chr19:55488817-55489056	tcctcaaagcctttccagtg	caagttggacccctgagtct
PRPF31	D19S605	Chr19:55751799-55752019	gaaggagggatgcaagctg	agtgcaagcgtgtgtgagag
RP63	D6S287	Chr6:119553726-119553966	tcggttccaatagttccaaa	agaagctataggcagccagat
RP63	D6S1715	Chr6:125790245-125790479	tcctatctgctgacagggaaa	aatcaccagcagtgggaatc
RP63	D6S1620	Chr6:129947699-129947944	accaggtatgcagctgatgg	aagttaatgcacagcattctcag
RP63	D6S457	Chr6:131855126-131855373	ttgctgtttcaggtcgagtg	cagagctgagaattggcaatag
RP63	D6S262	Chr6:131730648-131730895	gaagtggattcttactgctgga	ttgaaaacatggagaaactttacc
RP63	D6S975	Chr6:133546406-133546646	gtgagaccatctggggaaaa	gggtgagatgggaatcatgt
