# Supplementary material for: Mutations in Splicing Factor Genes Are a Major Cause of Autosomal Dominant Retinitis Pigmentosa in Belgian Families
Source: PLoS One. 2017 Jan 11;12(1):e0170038. doi: 10.1371/journal.pone.0170038 (PMC5226823; doi:10.1371/journal.pone.0170038)
Supplement: S2 Table — The maximum tolerated allele count was computed using an online calculator (https://jamesware.shinyapps.io/alleleFrequencyApp/). The allele count represents the count of each variant in ExAC or gnomAD for the entire studied population (indicated as ‘all’) and for the individual population groups in which the variant was found. The reference allele number is the total allele count screened in the reference population(s). Inheritance is monoallelic. The prevalence was calculated based on the prevalence of RP (1/5000), with about 30% to 40% having a dominant inheritance. We assumed that the maximum possible allelic contribution (maximum allelic heterogeneity) is the maximum genetic contribution (as described in Whiffin et al. for genes with a less characterized allelic heterogeneity). A range was taken for the maximum allelic heterogeneity; with minimum and maximum value being the in literature reported minimum and maximum contribution of a gene in adRP. Calculations were also made for the prevalence in the Belgian adRP population (B). Since non-penetrance has been described for several genes, we assumed three different penetrance values (1, 0.95 and 0.50). Maximum tolerated ref. AC = Maximum tolerated reference allele count. Blue shaded cells: Values needed for calculation of the maximum tolerated reference allele count. Orange shaded cells: variant counts that exceeded the maximum tolerated reference allele count [12]. (XLSX) [file pone.0170038.s002.xlsx]

## Sheet: Blad1
Gene	cDNA	Protein	Allele count	Reference allele number	Inheritance	Prevalence	Maximum allelic heterogeneity	Penetrance	Maximum tolerated ref. AC
RHO	c.563G>A	p.(Gly188Glu)	1/252,388 (GnomAD: all)	252,388	Monoallelic	1 in 12,500	[0.10;0.30]; B= 0.14	1	[3;6]; B= 4
								0.95	[3;6]; B=4
								0.50	[5;10]: B=6
			1/35,710 (GnomAD: Latino)	35,710	Monoallelic	1 in 12,500	[0.10;0.30]; B= 0.14	1	[1;2]; B= 1
								0.95	[1;2]; B= 1
								0.50	[1;3]; B= 2
RP1	c.3157del	p.(Tyr1053Thrfs*4)	2/121,108 (ExAC: all)	121,108	Monoallelic	1 in 12,500	[0.04;0.10]; B= 0.11	1	[1;2]; B=2
								0.95	[1;2]; B=2
								0.50	[2;3]; B=3
SNRNP200	c.2041C>T	p.(Arg681Cys)	1/252,348 (GnomAd: all)	252,348	Monoallelic	1 in 12,500	[0.02;0.04]; B=0.04	1	[1;2]: B=2
								0.95	[1;2]: B=2
								0.50	[2;2]: B=2
			1/112,194 (GnomAD: Europ. Non-Finnish)	112,194	Monoallelic	1 in 12,500		1	[1;1]: B=1
								0.95	[1;1]: B=1
								0.50	[1;2]: B=2
PRPH2	c.424C>T	p.(Arg142Trp)	3/121,412 (ExAC: all)	121,412	Monoallelic	1 in 12,500	[0;0.10]; B= 0.05	1	[/;2]; B= 1
								0.95	[/;2]; B= 1
								0.50	[/;3]; B= 2
			2/11,578 (ExAC: Latino)	11,578	Monoallelic	1 in 12,500	[0;0.10]; B= 0.05	1	[/;0]; B=0
								0.95	[/;0]; B=0
								0.50	[/;1]; B=0
			1/66,740 (ExAC: Europ. Non-Finnish)	66,740	Monoallelic	1 in 12,500	[0;0.10]; B= 0.05	1	[/;1]; B=1
								0.95	[/;1]; B=1
								0.50	[/;2]; B=2
			6/282,618 (GnomAD: all)	282.618	Monoallelic	1 in 12,500	[0;0.10]; B= 0.05	1	[/;3]; B= 2
								0.95	[/;3]; B= 2
								0.50	[/;5]; B= 3
			3/36,474 (GnomAD: Latino)	36.474	Monoallelic	1 in 12,500	[0;0.10]; B= 0.05	1	[/;1]; B= 1
								0.95	[/;1]; B= 1
								0.50	[/;1]; B= 1
			3/126,764 (GnomAD: Europ. Non-Finnish)	126.764	Monoallelic	1 in 12,500	[0;0.10]; B= 0.05	1	[/;2]; B= 1
								0.95	[/;2]; B= 1
								0.50	[/;3]; B= 2
PRPH2	c.647C>T	p.(Pro216Leu)	1/252,394 (GnomAD: all)	252,394	Monoallelic	1 in 12,500	[0;0.10]; B= 0.05	1	[/;3]; B= 2
								0.95	[/;3]; B= 2
								0.50	[/;5]; B= 3
			1/112,228 (GnomAD: Europ. Non-Finnish)	112,228	Monoallelic	1 in 12,500	[0;0.10]; B= 0.05	1	[/;2]; B= 1
								0.95	[/;2]; B= 1
								0.50	[/;3]; B= 2
